# Supplementary material for: Scalable Exfoliation of Bulk MoS2 to Single- and Few-Layers Using Toroidal Taylor Vortices
Source: PubMed Central journal article supplement (PMC6116258; doi:10.3390/nano8080587), 2018-08-01
Supplement: nanomaterials-08-00587-s001.pdf [file nanomaterials-08-00587-s001.pdf]

## Supporting Materials

# Scalable Exfoliation of Bulk MoS<sub>2</sub> to Single- and Few-Layers Using Toroidal Taylor Vortices

*Vishakha Kaushik<sup>1,†</sup>, Shunhe Wu<sup>1,†</sup>, Hoyoung Jang<sup>1</sup>, Je Kang<sup>1</sup>, Kyunghoon Kim<sup>1,\*</sup> and Ji Won  
Suk<sup>1,2,\*</sup>*

<sup>1</sup> School of Mechanical Engineering, Sungkyunkwan University, Suwon, Gyeonggi-do 16419, Republic  
of Korea

<sup>2</sup> SKKU Advanced Institute of Nanotechnology, Sungkyunkwan University, Suwon, Gyeonggi-do 16419,  
Republic of Korea

<sup>†</sup>These authors contributed equally to this work.

\*Corresponding authors: [kenkim@skku.edu](mailto:kenkim@skku.edu) (K. Kim) and [jwsuk@skku.edu](mailto:jwsuk@skku.edu) (J. W. Suk)

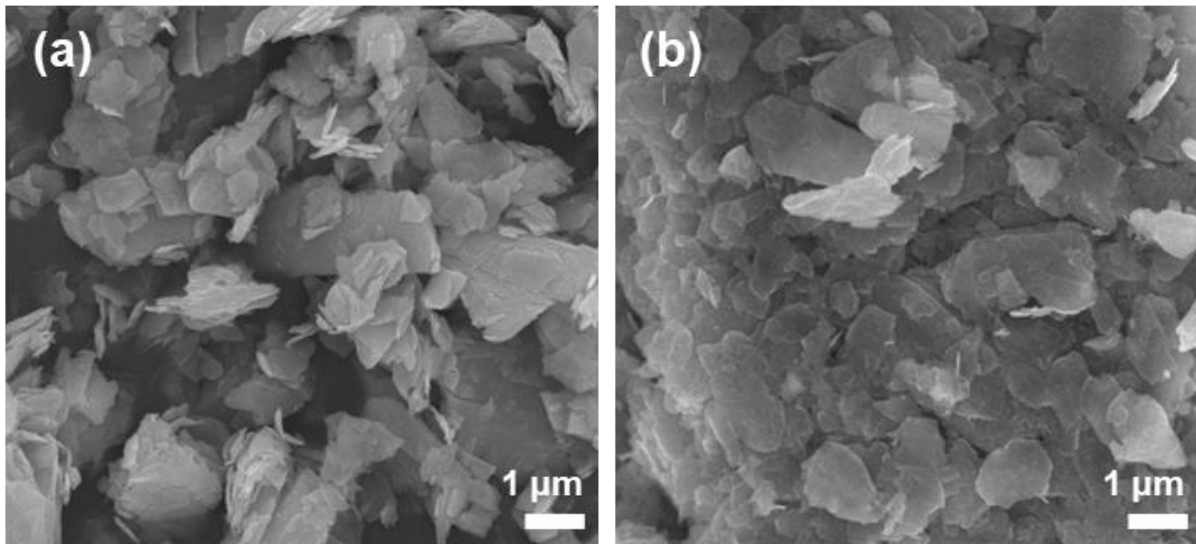

**Figure S1.** SEM images of (a) raw and (b) grinded MoS<sub>2</sub> powders.

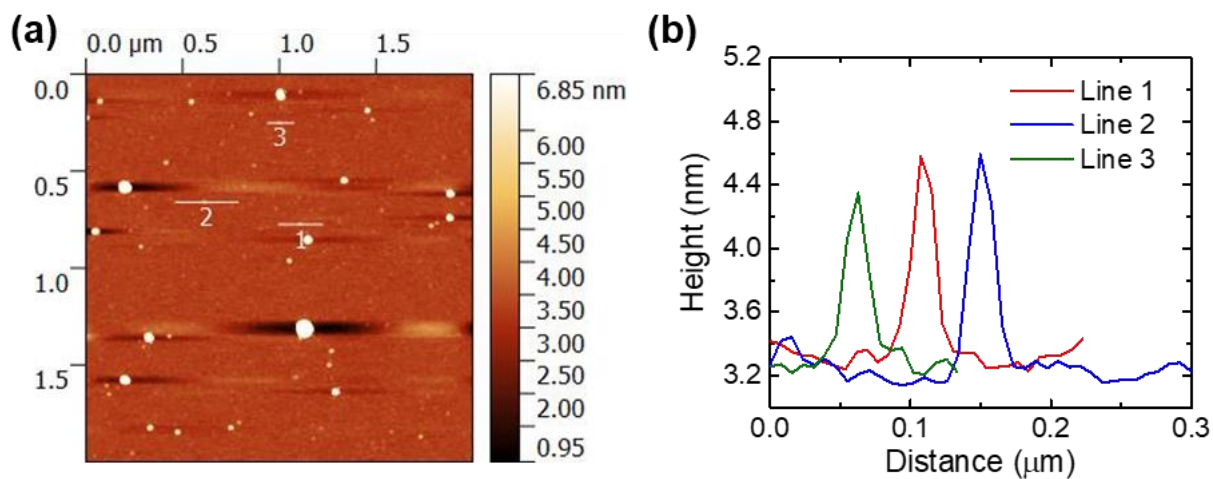

**Figure S2.** AFM analysis of the exfoliated MoS<sub>2</sub> nanosheets in a scan area of 2 μm × 2 μm. (a)

Topological image. (b) Line profiles obtained from (a).
